# Supplementary material
Source: Springer Nature journal article supplement (https://www.springermedizin.de/resource/supplementary/12962_2014_200_MOESM8_ESM.docx/9571902)
Supplement: MOESM8 [file 9571902]

Table 6. Costs and outcomes by type of CVR prevention

|  | Primary prevention | |  | Secondary prevention | |  | Mixed | |
| --- | --- | --- | --- | --- | --- | --- | --- | --- |
|  | Baseline | Change |  | Baseline | Change |  | Baseline | Change |
| PACIC (1-5 highest) | 2.64 (0.77) | 0.18* (0.76) |  | 2.52 (0.79) | 0.09 (0.75) |  | 2.92 (0.84) | 0.10* (0.82) |
| Physically active days per week | 5.25 (1.91) | 0.43* (1.94) |  | 5.15 (2.10) | 0.12 (2.11) |  | 4.91 (2.10) | 0.37** (2.20) |
| % smokers | 13 | -3* |  | 30 | -8** |  | 20 | -6** |
| Self-efficacy (1-6 highest) | 4.44 (0.85) | -0.29** (0.75) |  | 4.32 (0.92) | -0.30** (0.77) |  | 4.48 (0.86) | -0.27** (0.74) |
| EQ-5D | 0.85 (0.17) | -0.01 (0.15) |  | 0.77 (0.22) | 0.01 (0.19) |  | 0.84 (0.17) | -0.02* (0.15) |
| Primary care costs | 555 (827) | -16 (701) |  | 810 (1,153) | -149 (1,191) |  | 565 (751) | 97 (1,092) |
| Outpatient hospital care | 326 (662) | -104 (643) |  | 725 (1,342) | -34 (1,728) |  | 269 (492) | 76* (657) |
| Inpatient hospital care$ | 471 (3,009) | -334 (3,120) |  | 1,064 (5,012) | 932 (9,807) |  | 476 (3,085) | 742 (10,225) |
| Medication costs | 269 (275) | 0 (248) |  | 493 (423) | 1 (289) |  | 356 (351) | 4 (255) |
| Total healthcare utilization costs | 1,600 (3,665) | -447 (3,663) |  | 3052 (5,787) | 754 (10,204) |  | 1,653 (3,525) | 918 (10,574) |
| Travelling costs | 63 (145) | 73 (571) |  | 89 (221) | -48* (185) |  | 72 (226) | -5* (312) |
| Productivity costs | 3,542 (11,480) | -1,685 (10,076) |  | 1,119 (6,401) | -86 (6,964) |  | 1,405 (7,646) | -368 (6,743) |
| Total costs | 3,633 (10,091) | -317 (11,593) |  | 4,421 (10,657) | 159 (13,876) |  | 2,911 (8,201) | 725 (13,874) |

The table presents the mean (SD) and the mean difference (SD) between baseline and follow-up measurements; $ inpatient hospital care costs include also emergency care costs; * (p< 0.05); ** (p<0.01); the differences are calculated subtracting the costs at baseline from the costs at follow-up; primary care costs included contacts with GP, nurse practitioner, nurse, dietician, physiotherapist, podiatrist, lifestyle coach, etc
